# Supplementary material for: Vancomycin Prescribing Practices and Therapeutic Drug Monitoring for Critically Ill Neonatal and Pediatric Patients: A Survey of Physicians and Pharmacists in Hong Kong
Source: PubMed Central journal article supplement (PMC7734090; doi:10.3389/fped.2020.538298), 2020-11-30
Supplement: Image_8.pdf [file Image_8.pdf]

Supplementary Material 8: Trough Levels by each Respondent and Stratified by District

A: Suspected severe/complicated Gram positive infections

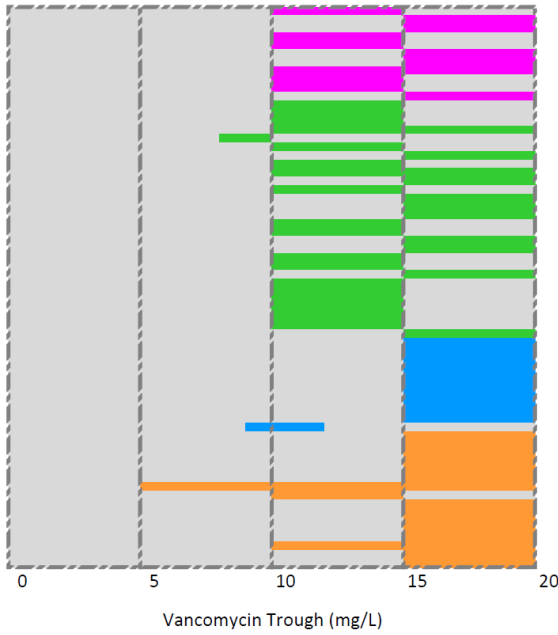

B: Methicillin-resistant Staphylococcus aureus

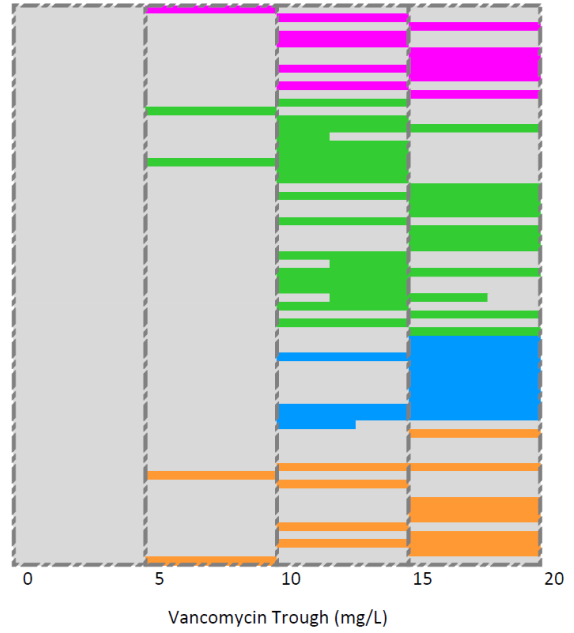

C: Methicillin-resistant coagulase-negative staphylococci

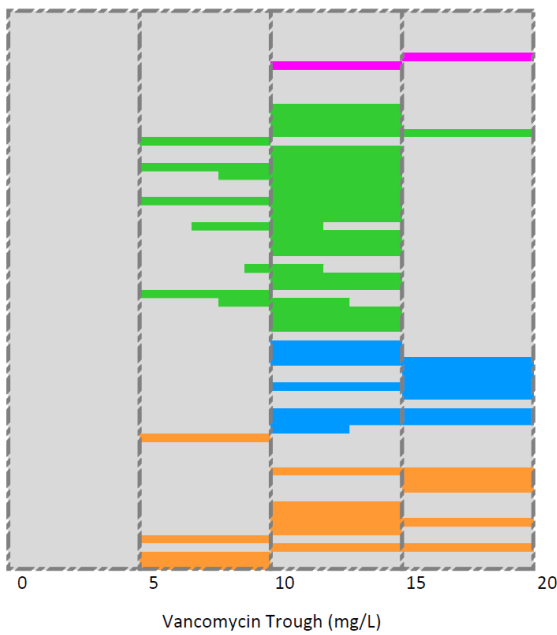

D: Suspected moderate/ uncomplicated Gram positive infections

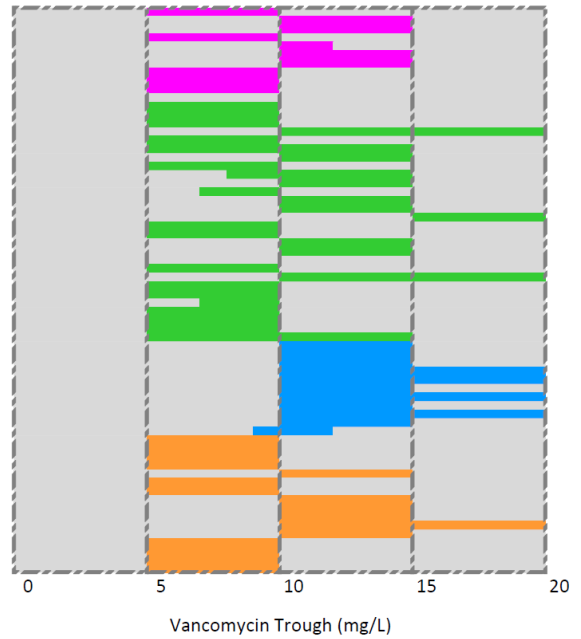

Each bar represents one respondent. Each color represents one district.
